# Supplementary material for: HDAC6 controls innate immune and autophagy responses to TLR-mediated signalling by the intracellular bacteria Listeria monocytogenes
Source: PubMed Central journal article supplement (PMC5760107; doi:10.1371/journal.ppat.1006799), 2017-12-27
Supplement: ppat.1006799.s007.pdf [file ppat.1006799.s007.pdf]

Supplemental Table 1. Antibody table.

| Antibody                         | Reference                      | Brand                      | Host    | Application | Dilution                   |
|----------------------------------|--------------------------------|----------------------------|---------|-------------|----------------------------|
| Acetylated cortactin             | 09-881                         | Millipore                  | rabbit  | IF          | IF (1:100)                 |
| AKT                              | #9272                          | Cell Signaling             | rabbit  | WB          | WB (1:1000)                |
| Anti-HA                          | 0000000115838<br>16001 (12CA5) | Roche (Sigma-<br>Aldrich)  | mouse   | IP          | IP (1-2 µg/point)          |
| Anti-HA                          | A190-108A                      | Bethyl                     | rabbit  | IP          | IP (1-2 µg/point)          |
| B220-PerCP-cyanine5.5            | 65-0452-U100<br>(RA 3-6B2)     | Tombo biociences           | rat     | FC          | FC (1:200)                 |
| CD11b-FITC                       | 553310 (M1/70)                 | BD Pharmingen              | rat     | FC          | FC (1:200)                 |
| CD11c-PE                         | 557401 (HL3)                   | BD Pharmingen              | hamster | FC          | FC (1:200)                 |
| CD11c-PeCy7                      | 558079 (HL3)                   | BD Pharmingen              | hamster | FC          | FC (1:200)                 |
| CD11c-PeCy7                      | 55079                          | BD Pharmingen              | hamster | FC          | FC (1:200)                 |
| CD16/32 Fc block                 | (clone 2.4G)                   | BD Pharmingen              | rat     | FC          | FC (1:200)                 |
| CD19- violetFluor450             | 75-0193-U100<br>(1D3)          | Tombo biociences           | rat     | FC          | FC (1:200)                 |
| CD24-PE                          | 12-0241-82 (30-<br>F1)         | ebioscience                | rat     | FC          | FC (1:200)                 |
| CD3-violetFluor450               | 75-0032-U100<br>(17A2)         | Tombo biociences           | rat     | FC          | FC (1:200)                 |
| CD8-APC                          | 558079 (HL3)                   | BD Pharmingen              | rat     | FC          | FC (1:200)                 |
| Chicken Anti-mouse 647           | A-21463                        | Life technologies          | chicken | FC          | FC (1:500)                 |
| Chicken Anti-rabbit 647          | A-21443                        | Life technologies          | chicken | FC          | FC (1:500)                 |
| Control isotype of<br>mouse      | sc-2025                        | Santa Cruz                 | rat     | IP          | IP (1-5 µg/point)          |
| Control isotype of rabbit        | sc-2027                        | Santa Cruz                 | rabbit  | IP          | IP (5 µg/point)            |
| DX5 (CD49b)-V450                 | 561638                         | BD biociences              | rat     | FC          | FC (1:200)                 |
| ERK1/2                           | #9102                          | Cell Signaling             | mouse   | WB          | WB (1:1000)                |
| Goat anti rabbit 488 Hx          | A-11008                        | Thermofisher<br>Scientific | goat    | IF          | IF (1:500)                 |
| Goat anti rabbit<br>Rodamin X HX | 111-295-144                    | Jackson                    | goat    | IF          | IF (1:500)                 |
| Goat anti-mouse-HRP              | #31430                         | Thermofisher<br>Scientific | goat    | WB          | WB (1:5000)                |
| Goat anti-rabbit-HRP             | #31460                         | Thermofisher<br>Scientific | goat    | WB          | WB (1:5000)                |
| Gr-1-APC                         | 553129 (RB6-8C5)               | BD Pharmingen              | rat     | FC          | FC (1:200)                 |
| HDAC6                            | C0226                          | Assay bioTech              | rabbit  | WB          | WB (1:500)                 |
| iNOS                             | # 29825                        | Cell Signaling             | rabbit  | WB          | WB (1:500)                 |
| LC3b                             | # 27755                        | Cell Signaling             | rabbit  | WB          | WB (1:500)                 |
| <i>Listeria</i>                  | 0400-0030                      | AbDSerotec                 | rabbit  | FC          | FC (1:200)                 |
| Ly6C-PerCP-Cy5.5                 | 560525                         | Becton Dickinson           | rat     | FC          | FC (1:200)                 |
| Ly6G-PE                          | 551461 (1A8)                   | BD biociences              | rat     | FC          | FC (1:200)                 |
| MHC-II I-A/I-E-APC               | 17-5321-81<br>(145/1/4.15.2)   | ebioscience                | rat     | FC          | FC (1:200)                 |
| MHC-II I-A/I-E-FITC              | 553623 (2G9)                   | BD Pharmingen              | rat     | FC          | FC (1:500)                 |
| MyD88                            | D80F5 #4283                    | Cell Signaling             | rabbit  | WB          | WB (1:500)                 |
| MyD88                            | sc-11356 (HFL-<br>296)         | Santa Cruz                 | rabbit  | WB          | WB (1:500)                 |
| MyD88                            | sc-136970 (B-1)                | Santa Cruz                 | mouse   | WB          | WB (1:500)                 |
| MyD88                            | MA5-15762<br>(2E9C2)           | TermoFisher<br>Scientific  | mouse   | WB          | WB (1:500)                 |
| p62                              | P0067                          | Sigma-Aldrich              | rabbit  | WB, FC      | WB (1:1000); FC<br>(1:200) |

|                             |                   |                |        |    |              |
|-----------------------------|-------------------|----------------|--------|----|--------------|
| p70S6K                      | #2703             | Cell Signaling | rabbit | WB | WB (1:1000)  |
| phAKT (Ser473)              | #9271             | Cell Signaling | rabbit | WB | WB (1:1000)  |
| phERK1/2<br>(Thr202/Thr204) | #9101             | Cell Signaling | rabbit | WB | WB (1:1000)  |
| php70S6K                    | #9205             | Cell Signaling | rabbit | WB | WB (1:1000)  |
| phS6 (Ser235/236)           | #2211             | Cell Signaling | rabbit | WB | WB (1:1000)  |
| S6                          | #2717             | Cell Signaling | rabbit | WB | WB (1:1000)  |
| Streptavidin-APC            | 554067            | BD Pharmingen  | -      | FC | FC (1:300)   |
| tubulin                     | T9026 (DH1A)      | Sigma-Aldrich  | mouse  | WB | WB (1:2000)  |
| β-actin                     | A2228 (AC-74)     | Sigma-Aldrich  | mouse  | WB | WB (1:2000)  |
| HLA-DR-PerCP                | 560652 (G46-6)    | BD biociences  | mouse  | FC | FC (1:200)   |
| CD3e                        | T3b hybridoma     | (68)           | mouse  | FC | FC (5 µg/ml) |
| DC-SIGN (CD209)             | sc-59157 (MR-1)   | Santa Cruz     | mouse  | FC | FC (1:200)   |
| CD11c-PE                    | 555392 (B-ly6)    | BD biociences  | mouse  | FC | FC (1:200)   |
| CD14-FITC                   | 14F-100T (47-3D6) | Immunostep     | mouse  | FC | FC (1:200)   |
| Streptavidin-BV421          | 563259            | BD biociences  | -      | FC | FC (1:300)   |
