# Supplementary material for: HDAC6 controls innate immune and autophagy responses to TLR-mediated signalling by the intracellular bacteria Listeria monocytogenes
Source: PubMed Central journal article supplement (PMC5760107; doi:10.1371/journal.ppat.1006799), 2017-12-27
Supplement: ppat.1006799.s008.pdf [file ppat.1006799.s008.pdf]

Supplemental Table 2. qPCR primers.

| <b>Gene</b>                         | <b>Sequence 5'-3'</b>    |
|-------------------------------------|--------------------------|
| <b>Atg12 Fw</b>                     | AACAAAGAAATGGGCTGTGGAGCG |
| <b>Atg12 Rv</b>                     | TTCCGAGGCCACCAGTTTAAGGAA |
| <b>Atg2 Fw</b>                      | CCACCTCTGCAAATCGGCA      |
| <b>Atg2 Rv</b>                      | CCAGTTGTCCTGATACCTCCA    |
| <b>Atg5 Fw</b>                      | GACAAAGATGTGCTTCGAGATGTG |
| <b>Atg5 Rv</b>                      | GTAGCTCAGATGCTCGCTCAG    |
| <b>Atg7 Fw</b>                      | ATGCCAGGACACCCTGTGAACTTC |
| <b>Atg7 Rv</b>                      | ACATCATTGCAGAAGTAGCAGCCA |
| <b>Beclin-1 Fw</b>                  | GGCCAATAAGATGGGTCTGA     |
| <b>Beclin-1 Rv</b>                  | CACTGCCTCCAGTGTCTTCA     |
| <b>CXCL10 Fw</b>                    | CCAAGTGCTGCCGTCATTTTC    |
| <b>CXCL10 Rv</b>                    | TCCCTATGGCCCTCATTCTCA    |
| <b>CXCL5 Fw</b>                     | TGCGTTGTGTTTGCTTAACCG    |
| <b>CXCL5 Rv</b>                     | CTTCCACCGTAGGGCACTG      |
| <b>CXCR1 Fw</b>                     | TCTGGACTAATCCTGAGGGTG    |
| <b>CXCR1 Rv</b>                     | GCCTGTTGGTTATTGGAACCTC   |
| <b>IFIT3 Fw</b>                     | GTGGACTGAGATTTCTGAACTGC  |
| <b>IFIT3 Rv</b>                     | CAGAGATTCCTGGTTGACCT     |
| <b>IFN-<math>\beta</math> Fw</b>    | TCAGAATGAGTGGTGGTTGC     |
| <b>IFN-<math>\beta</math> Rv</b>    | GACCTTTCAAATGCAGTAGATTCA |
| <b>IL12p40 Fw</b>                   | GGAAGCACGGCAGCAGAAT      |
| <b>IL12p40 Rv</b>                   | AACTTGAGGGAGAAGTAGGAATGG |
| <b>IL-1<math>\beta</math> Fw</b>    | GCAACTGTTCTGAACTCAACT    |
| <b>IL-1<math>\beta</math> Rv</b>    | ATCTTTTGGGGTCCGTCAACT    |
| <b>ISG15 Fw</b>                     | GGTGTCCGTGACTAACTCCAT    |
| <b>ISG15 Rv</b>                     | TGGAAAGGGTAAGACCGTCCT    |
| <b>LAMP-1 Fw</b>                    | AGCATACCGGTGTGTCAGTG     |
| <b>LAMP-1 Rv</b>                    | GTTGGGGAAGGTCCATCCTG     |
| <b>LAMP2a Fw</b>                    | TGGCTAATGGCTCAGCTTTC     |
| <b>LAMP2a Rv</b>                    | ATGGGCACAAGGAAGTTGTC     |
| <b>LC3A Fw</b>                      | TTGGTCAAGATCATCCGGC      |
| <b>LC3A Rv</b>                      | GCTCACCATGCTGTGCTGG      |
| <b>LC3B Fw</b>                      | CCCACCAAGATCCCAGTGAT     |
| <b>LC3B Rv</b>                      | CCAGGAACTTGGTCTTGCTCA    |
| <b>Mx1 Fw</b>                       | GACCATAGGGGTCTTGACAA     |
| <b>Mx1 Rv</b>                       | AGACTTGCTCTTTCTGAAAAGCC  |
| <b>p62 Fw</b>                       | ATGTGGAACATGGAGGGAAGA    |
| <b>p62 Rv</b>                       | GGAGTTCACCTGTAGATGGGT    |
| <b>PanIFN<math>\alpha</math> Fw</b> | CCTGAGARAGAAGAAACACAGCC  |
| <b>PanIFN<math>\alpha</math> Rv</b> | GGCTCTCCAGAYTTCTGCTCT    |
| <b>TLR-1 Fw</b>                     | TGAGGGTCCTGATAATGTCCTAC  |
| <b>TLR-1 Rv</b>                     | AGAGGTCCAAATGCTTGAGGC    |
| <b>TLR-2 Fw</b>                     | GCAAACGCTGTTCTGCTCAG     |
| <b>TLR-2 Rv</b>                     | AGGCGTCTCCCTCTATTGTATT   |
| <b>TLR-6 Fw</b>                     | TGAGCCAAGACAGAAAACCCA    |
| <b>TLR-6 Rv</b>                     | GGGACATGAGTAAGGTTCTGTT   |
| <b>TNF-<math>\alpha</math> Fw</b>   | CCCTTCTCCGATGGCTAC       |
| <b>TNF-<math>\alpha</math> Rv</b>   | CGCCTCCTTCTTGTTCTGG      |
